# Supplementary material for: DNA-Programmed plasmonic ELISA for the ultrasensitive detection of protein biomarkers
Source: Royal Society of Chemistry journal article supplement (doi:10.1039/d0an00656d), 2020-01-01
Supplement: d0an00656d1.pdf [file d0an00656d1.pdf]

# Supporting Information

## **DNA-Programmed Plasmonic ELISA for the Ultrasensitive Detection of Protein Biomarkers**

Yu-Hong Cheng, Hao Tang\*, Ru-Qin Yu, Jian-Hui Jiang\*

Institute of Chemical Biology and Nanomedicine, State Key Laboratory of Chemo/Bio-Sensing and Chemometrics, College of Chemistry and Chemical Engineering, Hunan University, Changsha 410082 (P. R. China)

Email: haotang@hnu.edu.cn; jianhuijiang@hnu.edu.cn Tel: 86-731-88821916; Fax: 86-731-88821916

### *Table of Contents*

S-2. Table S1. Sequences of synthesized DNA probes

S-3. Figure S1. AFM image of HCR products.

S-4. Figure S2. Conventional colorimetric ELISA for PSA detection

S-5. Figure S3. Selectivity investigation of the developed method for PSA detection

S-6. Figure S4. Investigation of the developed method for PSA detection in complex biological media

**Table S1.** Sequences of synthesized DNA probes.

| Name                   | Sequences (5'-3')                                                                                                       |
|------------------------|-------------------------------------------------------------------------------------------------------------------------|
| Biotinylated DNA probe | Biotin- <u>TTT TTT</u> TCT CAA GGA CCA CCG CAT CTC TAC                                                                  |
| Hairpin probe H1       | GTA GAG ATG CGG TGG TCC TTG AGA CAA AGT TCT CAA<br>GGA CCA CCG CAT <u>TTT TTT TTT</u> TGT ACT CAA TGT CCA<br>GTC TCT AG |
| Hairpin probe H2       | TCT CAA GGA CCA CCG CAT CTC TAC ATG CGG TGG TCC<br>TTG AGA ACT TTG                                                      |
| Hairpin probe H3       | <u>TTT TTT TTT TTT TTT</u> CTA GAG ACT GGA CAT TGA GTA<br>CCT TGT GTA GCT CGT ACT CAA TGT CCA                           |
| Hairpin probe H4       | <u>TTT TTT TTT TTT TTT</u> ATG AGT ACG AGC TAC ACA AGG<br>TAC TCA ATG TCC ACT TGT GTA GCT C                             |
| Thiolated DNA probe    | SH- <u>AAA AAA</u> AAA AAA AAA AAA AAA                                                                                  |

The red letter in biotinylated DNA probe and hairpin probe H1 indicates the complementary sequences, green letter in hairpin probe H1 indicates the toehold region for initiating catalyzed chain reaction with hairpin probe H3. The blue letter in hairpin probe H3, hairpin probe H4 and thiolated DNA probe indicates complementary sequences. The underline sequences indicate spacer region.

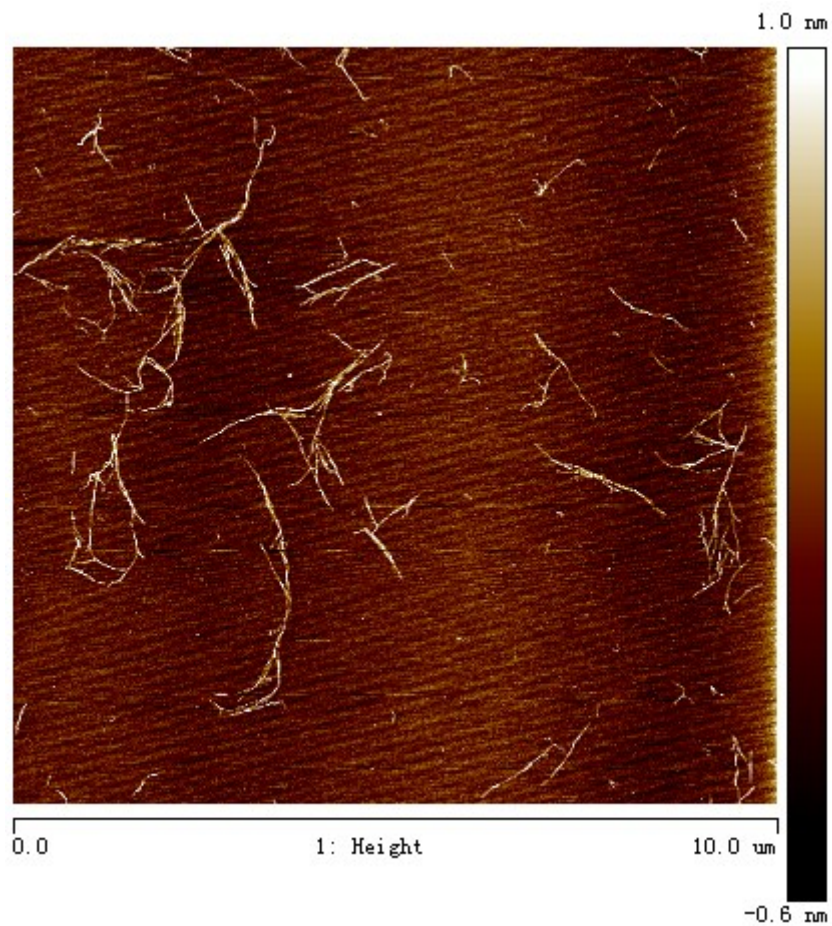

**Figure S1.** The AFM images show the polymerization of the 10 μM H1 and 10 μM H2 hairpin pair with 100 nM DNA initiator.

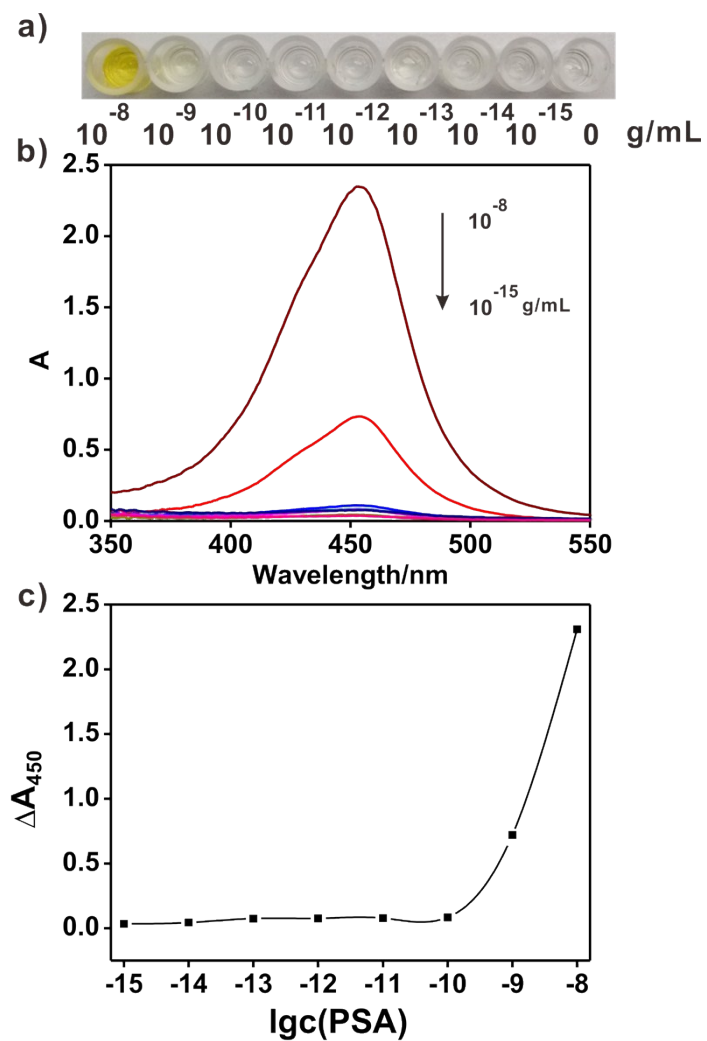

**Figure S2.** Conventional colorimetric ELISA for PSA detection utilizing HRP as enzyme label and TMB as substrate. Colors of the solution (a), corresponding absorption spectrum (b) and corresponding  $\Delta A_{450}$  (c) with PSA concentrations in the range from  $10^{-15}$  to  $10^{-8}$  g/mL.

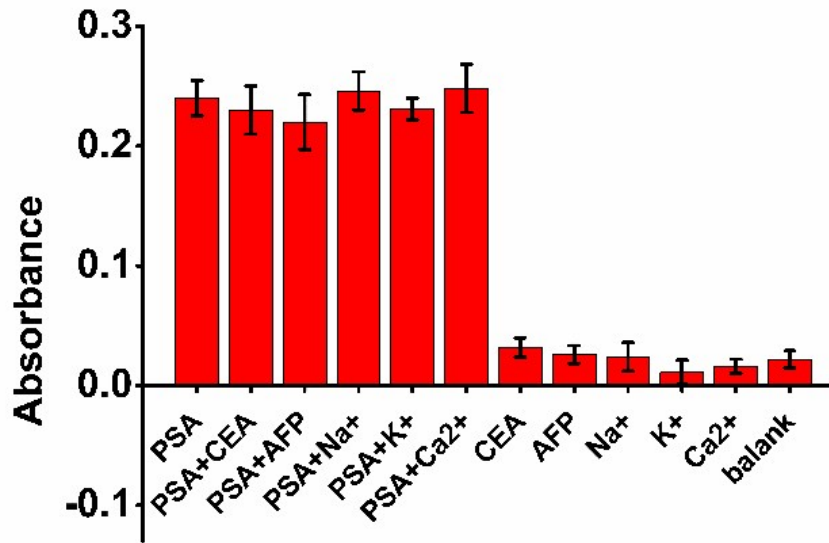

**Figure S3** Selectivity investigation for PSA ( $10^{-10}$  g/mL) in the presence of  $10^{-9}$  g/mL a) CEA, b) AFP, c) calcium ions, d) sodium ions, e) potassium ions and f) blank in 10 % fetal bovine serum. Error bars indicate the standard deviation of three independent measurements.

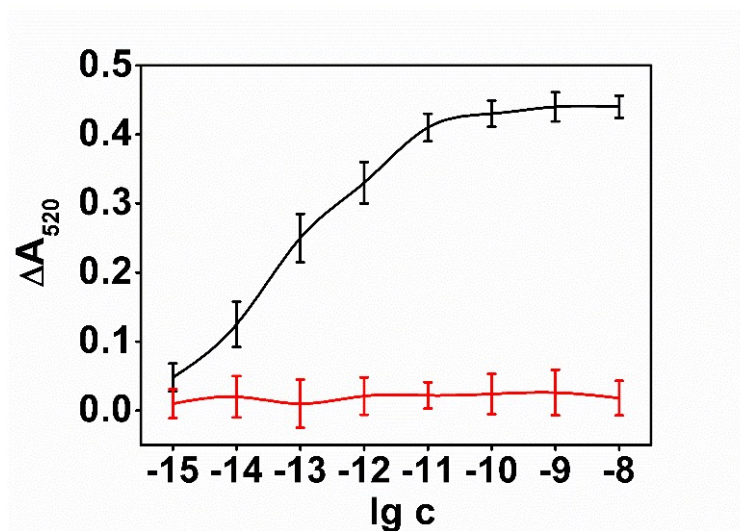

**Figure S4** Measurement of PSA concentration in 10 % serum by the developed method. Black curve was obtained by spiking different concentrations of PSA into 10 % fetal bovine serum ( $10^{-15}$  to  $10^{-8}$  g/L). Red curve was obtained by spiking the unrelated protein BSA. Error bars indicate the standard deviation of three independent measurements.
